# Supplementary material
Source: PubMed Central journal article supplement (PMC3072055)

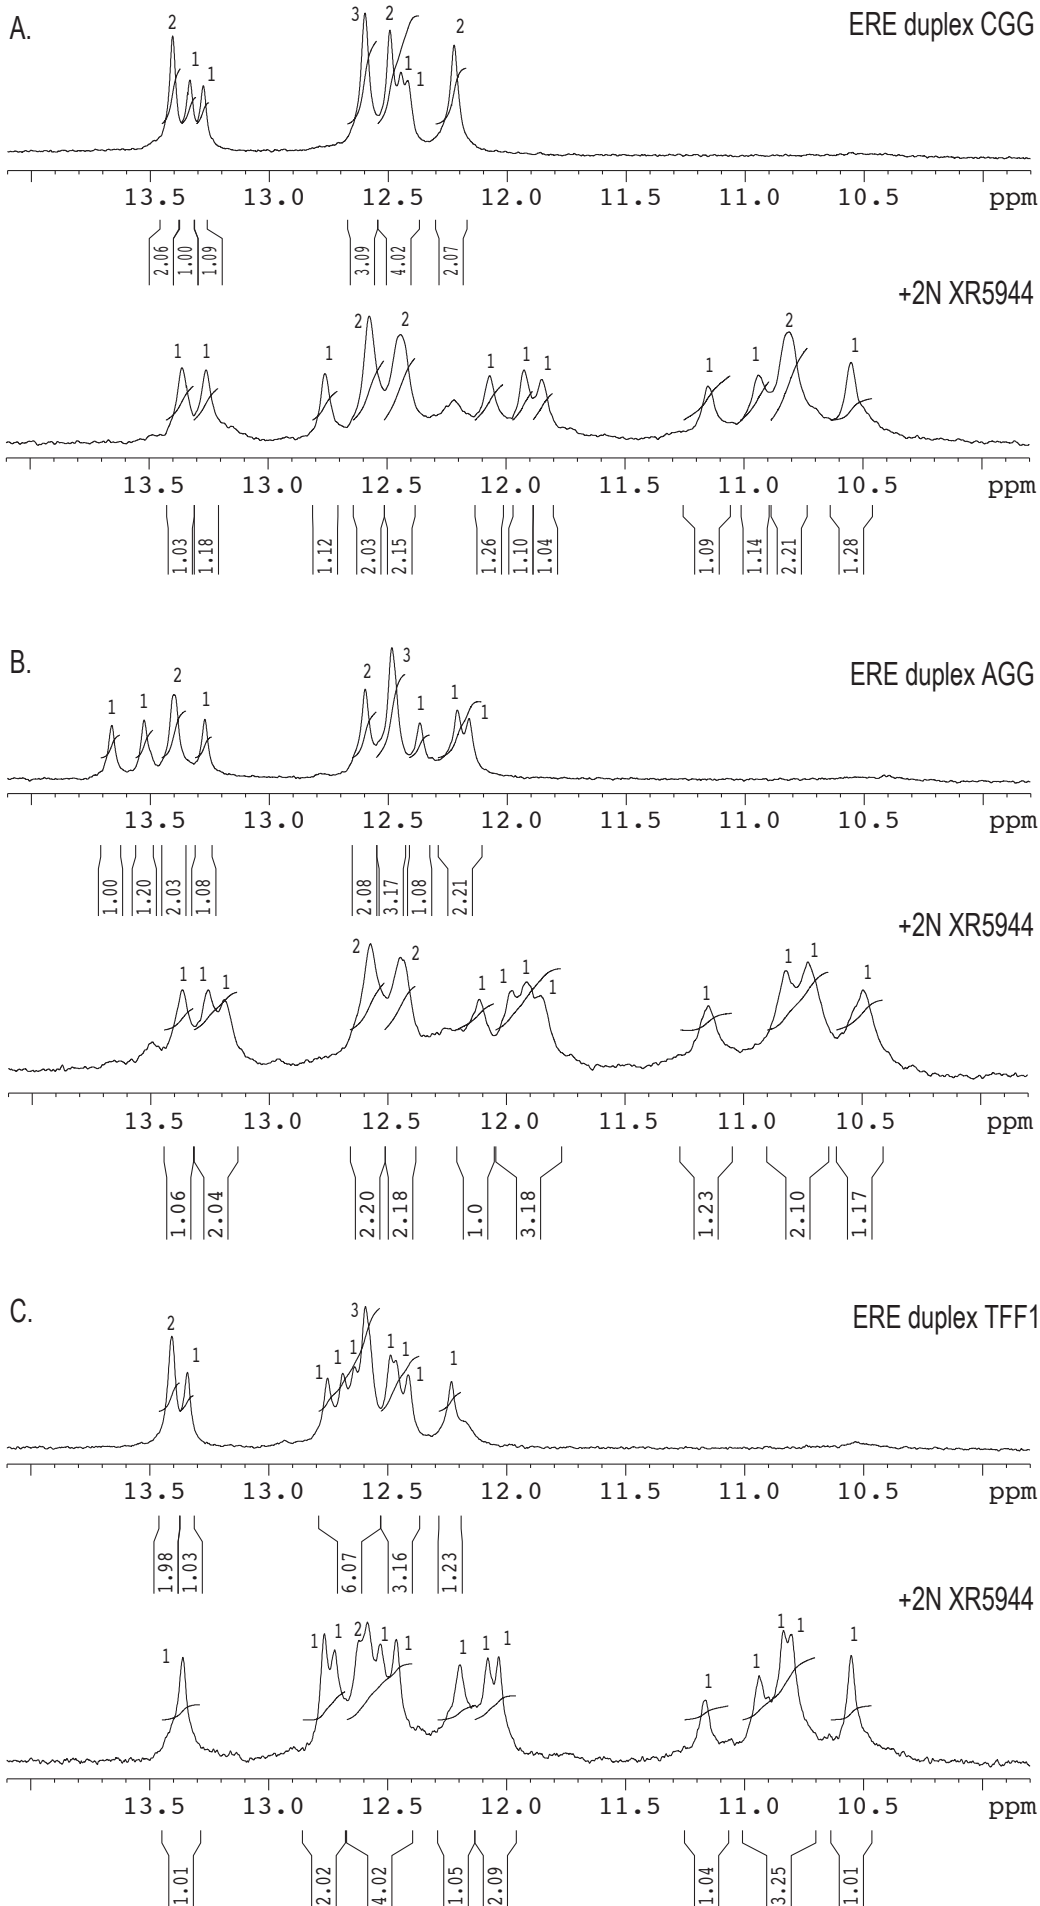

Figure S1

Supplement: NIHMS280011-supplement-01.pdf [file NIHMS280011-supplement-01.pdf]
